# Supplementary material for: Biocatalytic Cascade of Sebacic Acid Production with In Situ Co-Factor Regeneration Enabled by Engineering of an Alcohol Dehydrogenase
Source: MDPI journal article supplement (doi:10.3390/catal12111318), 2022-10-27
Supplement: s1 [file s1]

Archive with 1 entries (1 files):
- catalysts-1963030-Supplementary Materials.pdf
